# Supplementary material for: Insight into virus encapsulation mechanism through in silico interaction study between coat protein and RNA operator loops of Sesbania mosaic virus
Source: Royal Society of Chemistry journal article supplement (doi:10.1039/c6mb00206d), 2016-03-29

Fig S2 : i) Secondary structure analysis of predicted model (generated from PDBSum database). Magenta color shows helices present in the three-dimensional structure of coat protein. Arrow represents the  $\beta$  strand present in the structure. Presence of  $\beta$  turns and loops is labeled. ii) Three-dimensional structure of coat protein, all secondary structure components are labeled according to their presence from N-terminal to C-terminal. Blue color shows ARM region position in three-dimensional structure. Green color shows R Domain of coat protein which was not crystallized while magenta is showing S Domain.

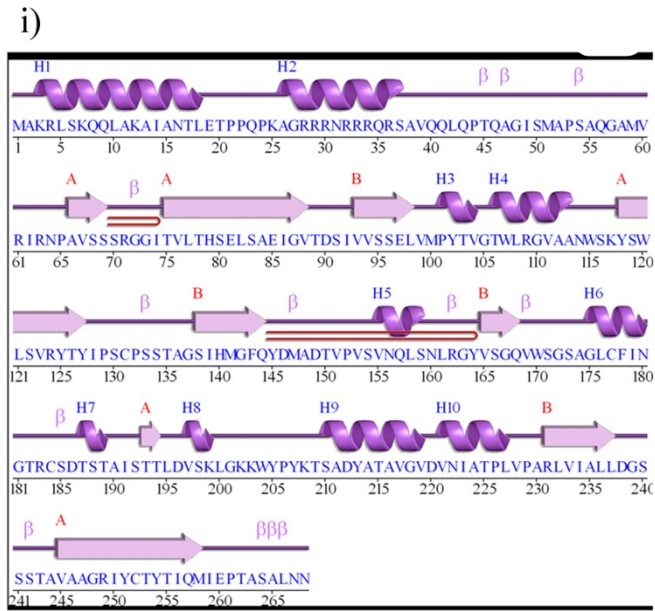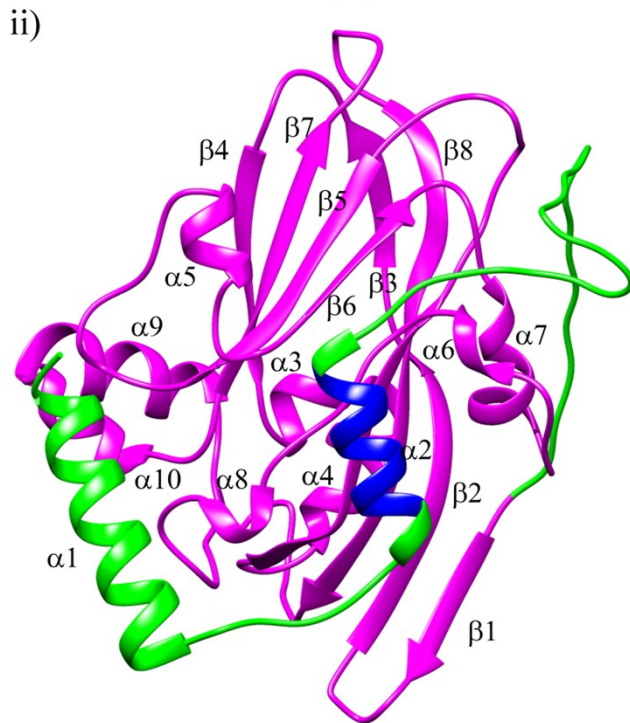

Fig S3 : Secondary structure of genome of SeMV virus predicted using RNAWeb server.

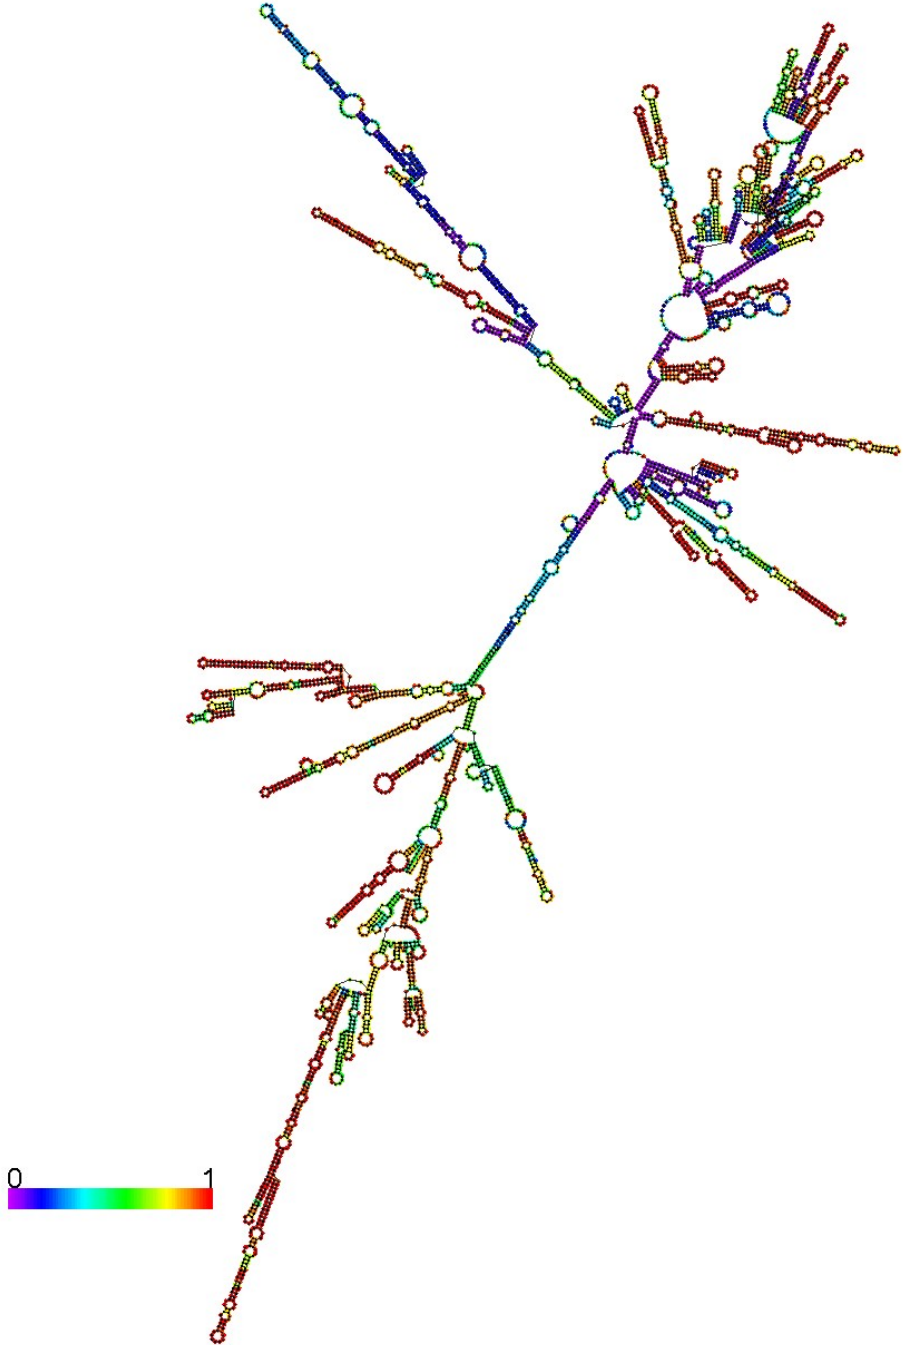

Fig S4: RMS fluctuation of coat protein alone and coat protein complex with Loop7. Black color shows complex while Red color shows coat protein. ARM region is boxed while R and S domain are represented by blue and green color lines, respectively.

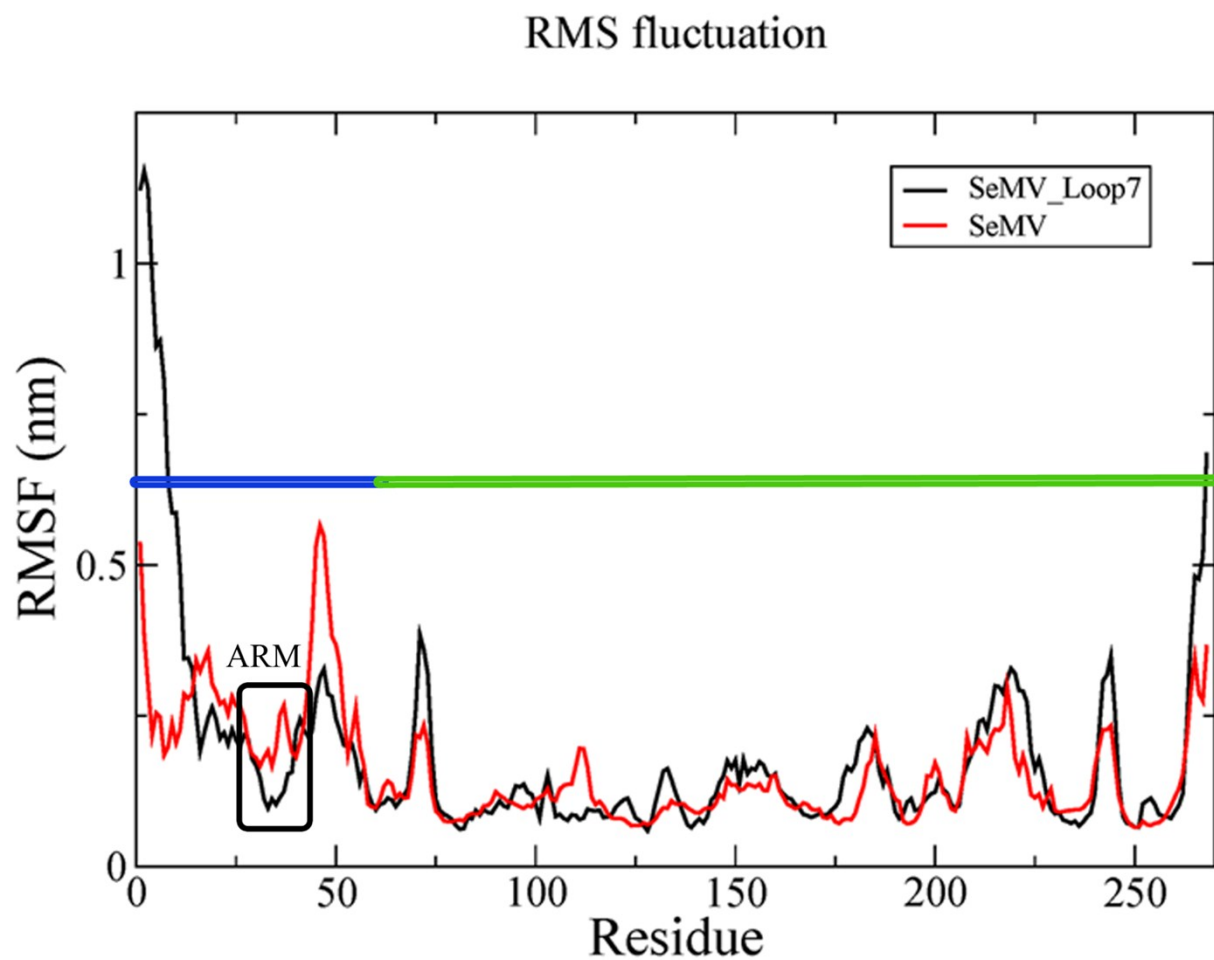

Fig S5 : Movement of N-terminal region throughout the simulation of coat protein alone. The first helix loses its helicity and turned to coil and bending downwards.

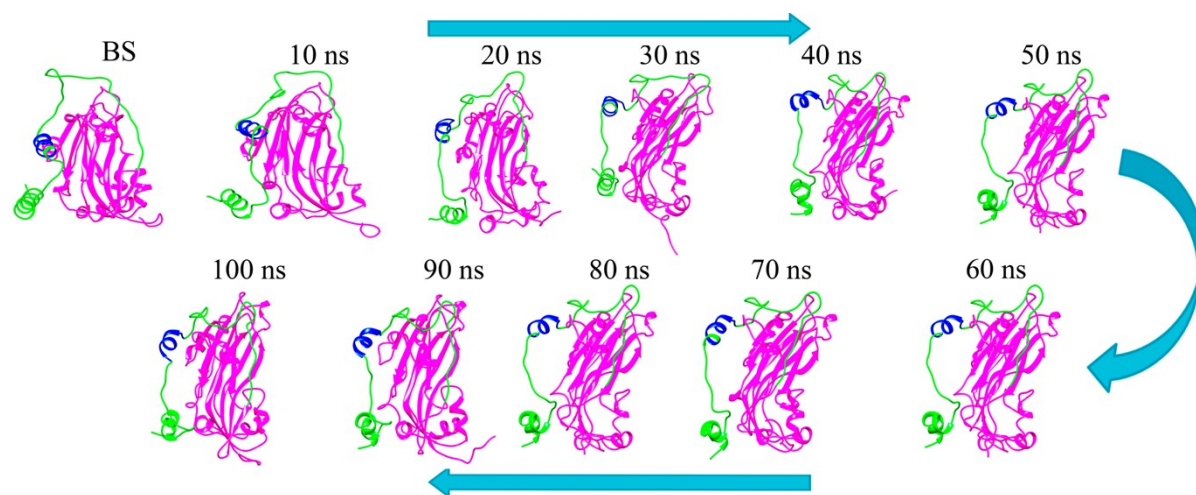

Fig S6 : Free energy landscape for coat protein alone and complex with RNA operator loop. i) Loop4, ii) Loop9, iii) Loop11, iv) Loop13 and v) Loop14.

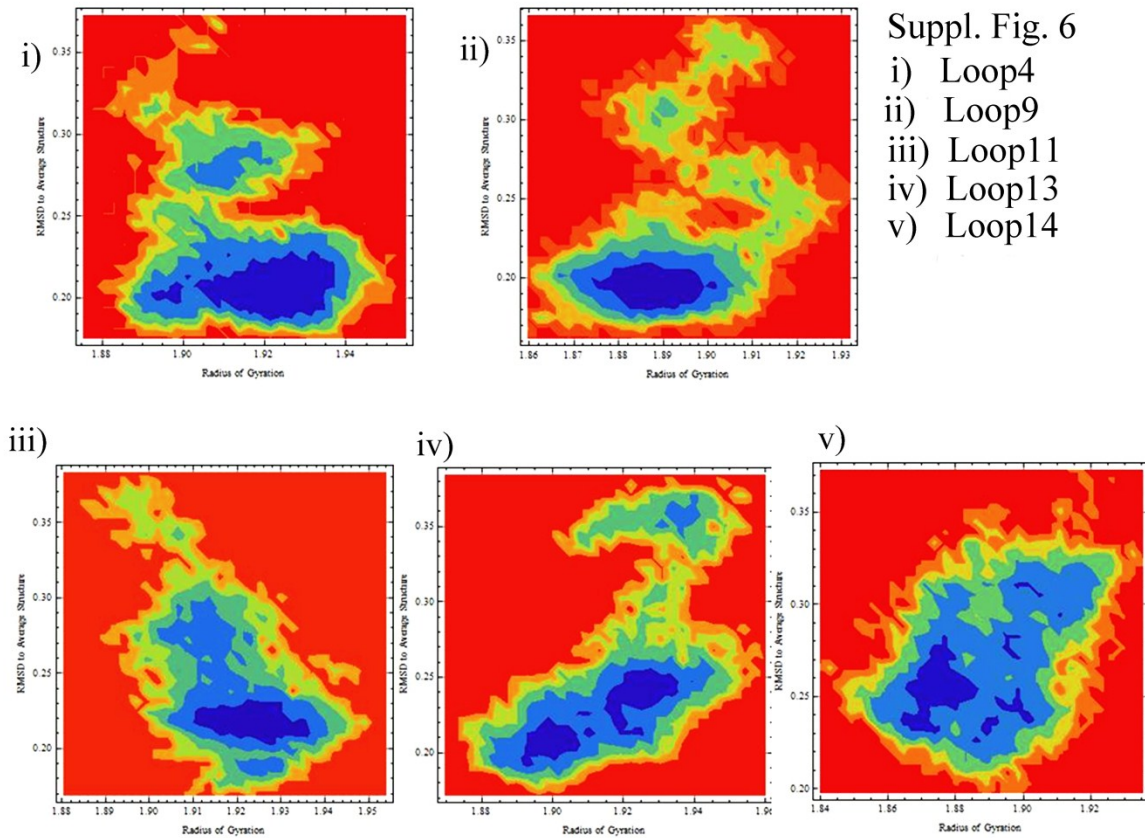



Fig S7 : H-bond existing graph of protein RNA complexes. i) SeMV coat protein-RNA operator Loop7 complex graph. ii) Mutated SeMV coat protein-RNA operator Loop7 complex. iii) SeMV coat protein-Mutated RNA operator loop complex graph. All graphs are generated for 10 ns simulation period. These graphs were generated between simulation time(X axis) and existence of H-bond(Y axis) throughout the simulation. The intensity of Red color line shows the existence of H-bond throughout the simulation. The number of Red line represents the number of H-bond of that complex.

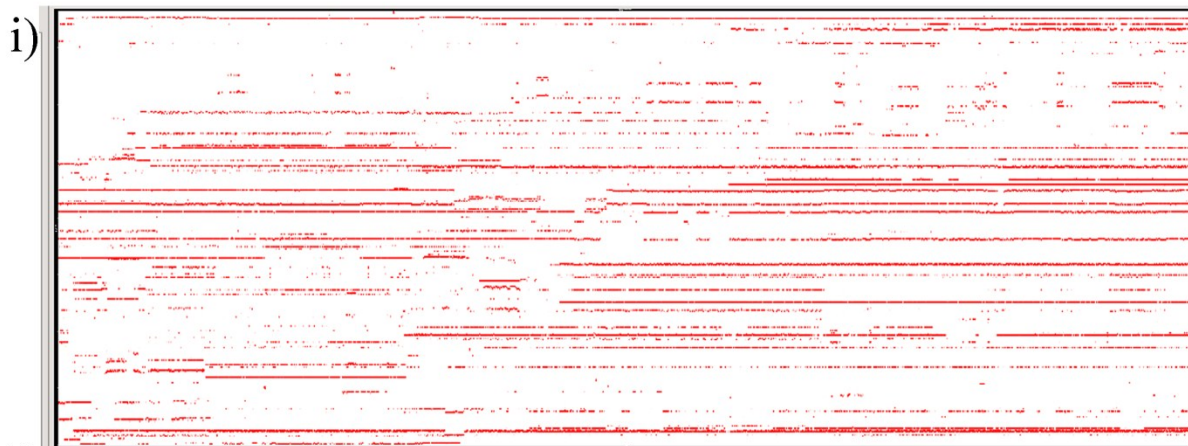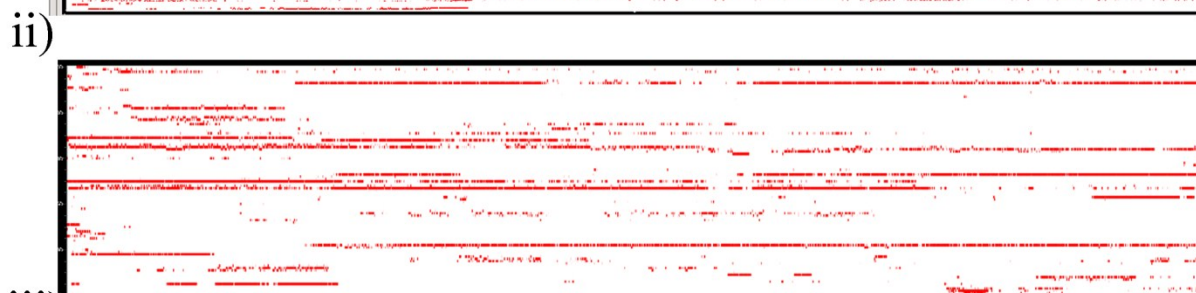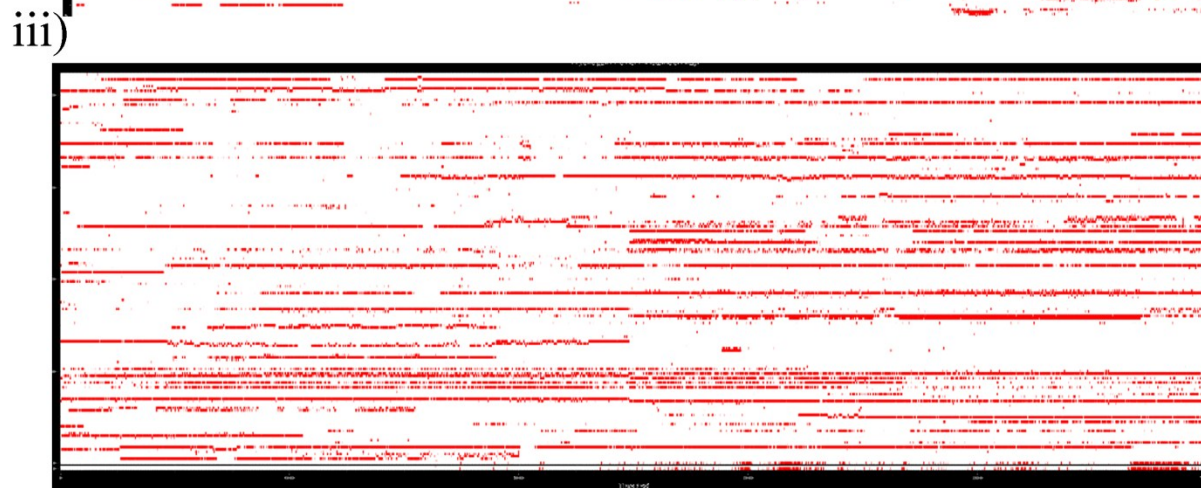

Supplement: c6mb00206d1.pdf [file c6mb00206d1.pdf]
